# Supplementary material
Source: publisher site journal article supplement (http://kjim.org/upload/media/kjim-2021-539-suppl2.pdf)
Supplement: Supplementary file 1 [file kjim-2021-539-suppl2.pdf]

**Supplementary Table 2. Clinical outcomes during post-discharge 6-month follow-up, from 1,435 acute myocardial infarction survivors with advanced Killip class III–IV treated by percutaneous coronary intervention procedure**

| Characteristic        | Off-hours group<br>(n = 860) | On-hours group<br>(n = 575) | p value |
|-----------------------|------------------------------|-----------------------------|---------|
| MACCE                 | 277 (32.2)                   | 194 (33.7)                  | 0.545   |
| NACE                  | 207 (24.1)                   | 141 (24.5)                  | 0.845   |
| All-cause mortality   | 187 (21.7)                   | 134 (23.3)                  | 0.487   |
| Cardiac death         | 124 (14.4)                   | 84 (14.6)                   | 0.920   |
| Non-cardiac death     | 63 (7.3)                     | 50 (8.7)                    | 0.345   |
| NFMI                  | 46 (5.3)                     | 27 (4.7)                    | 0.581   |
| Any revascularization | 84 (9.8)                     | 58 (10.1)                   | 0.843   |
| CVA                   | 17 (2.0)                     | 16 (2.8)                    | 0.318   |
| ST                    | 7 (0.8)                      | 4 (0.7)                     | 1.000   |

Values are presented as number (%). MACCE is defined as a composite of all-cause mortality, non-fatal myocardial infarction, any revascularization, cerebrovascular accident, and stent thrombosis.

MACCE, major adverse cardiac and cerebrovascular event; NACE, net adverse clinical endpoint; NFMI, non-fatal myocardial infarction; CVA, cerebrovascular accident; ST, stent thrombosis.
